# Supplementary material
Source: Royal Society of Chemistry journal article supplement (doi:10.1039/d6cp00708b)
Supplement: d6cp00708b1.pdf [file d6cp00708b1.pdf]

## **Exploration of aminomethylene linkage in carbazole based donor- $\pi$ -acceptor molecules for AIE properties and hydrazine sensing**

Jay Patel, Rina Soni<sup>#</sup>, Divyesh Patel<sup>\*</sup>

Department of Chemistry, Faculty of Science, The Maharaja Sayajirao University of Baroda,  
Vadodara-390002, Gujarat, India.

<sup>\*</sup>Authors for Correspondence: Dr. Divyesh Patel, [divyesh.patel-chem@msubaroda.ac.in](mailto:divyesh.patel-chem@msubaroda.ac.in)

<sup>#</sup>Authors for Co-correspondence: Dr. Rina Soni, [src\\_rina@outlook.com](mailto:src_rina@outlook.com)

**<sup>1</sup>H-NMR of 5-(((9-ethyl-9H-carbazol-3-yl)amino)methylene)pyrimidine-2,4,6(1H,3H,5H)-trione (8a)**

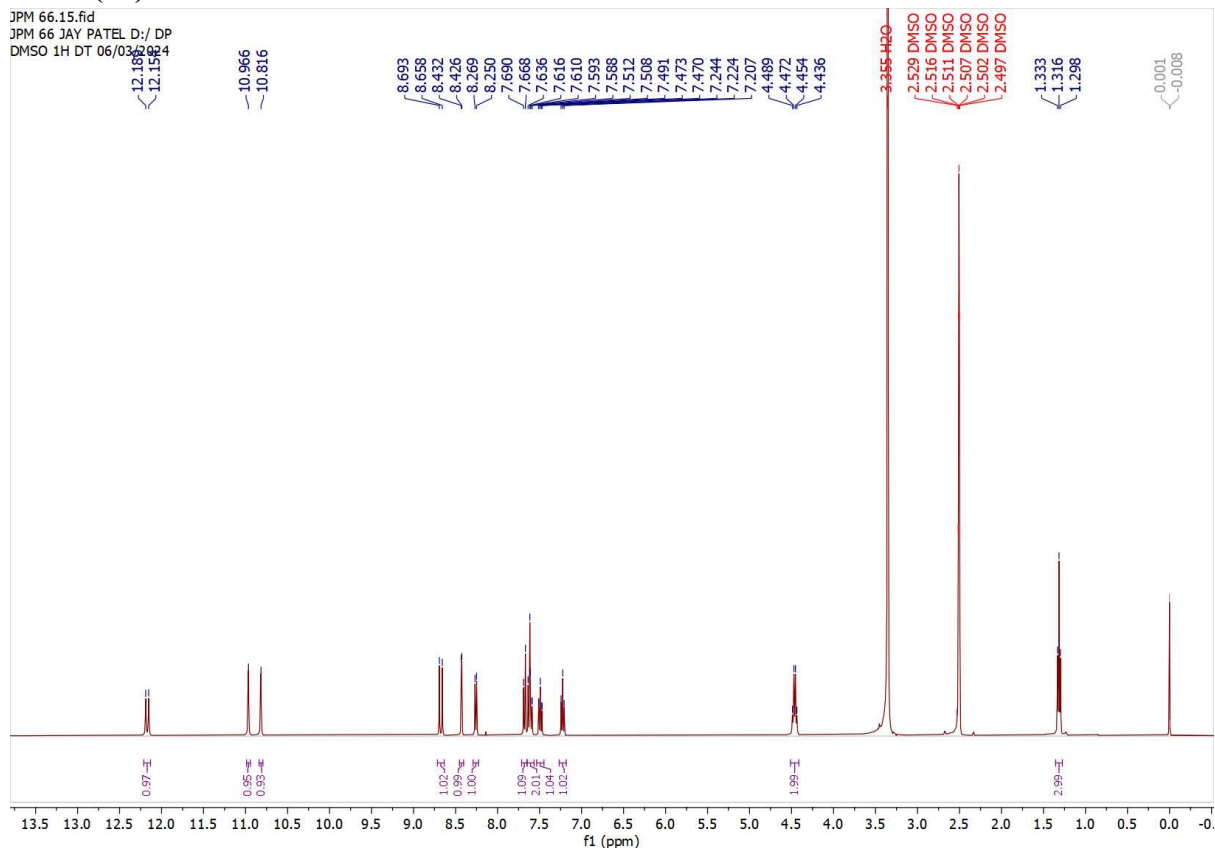

**<sup>13</sup>C-NMR of 5-(((9-ethyl-9H-carbazol-3-yl)amino)methylene)pyrimidine-2,4,6(1H,3H,5H)-trione (8a)**

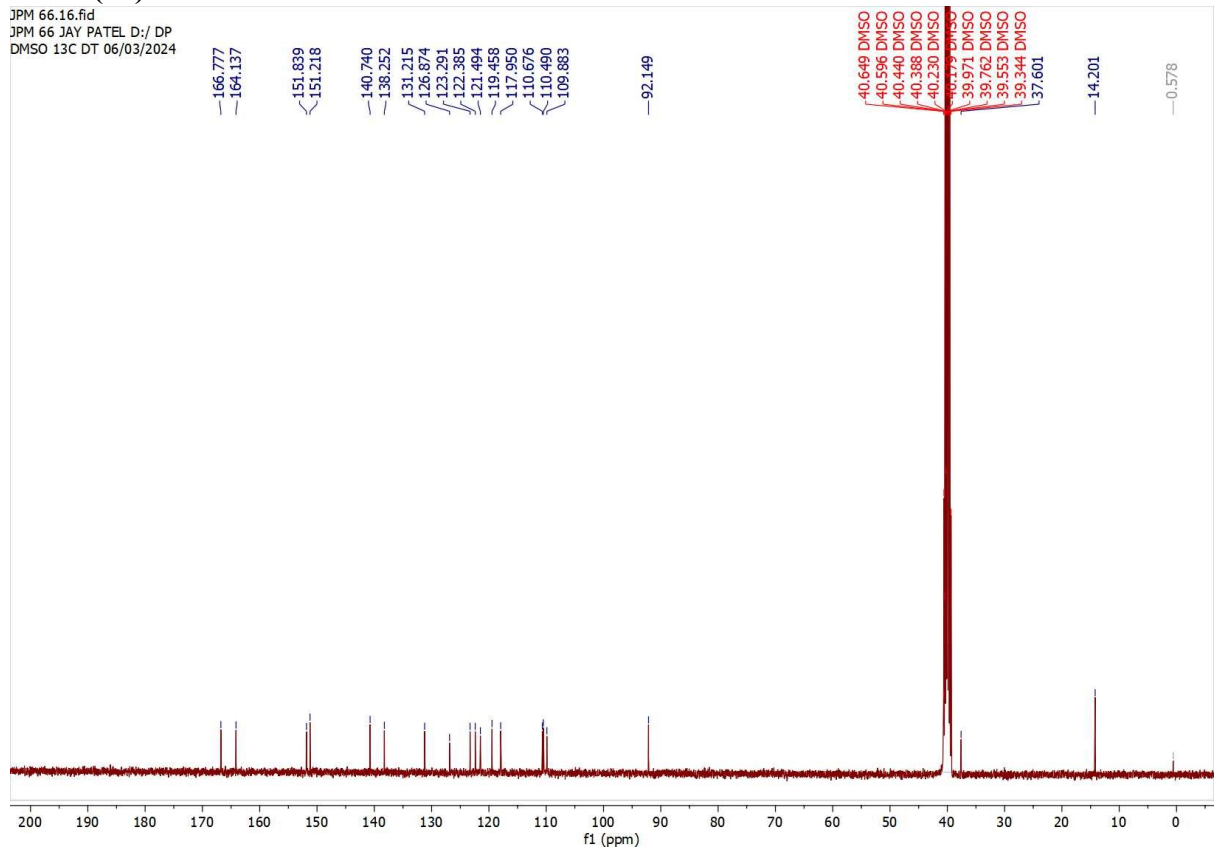

**Mass of 5-(((9-ethyl-9H-carbazol-3-yl)amino)methylene)pyrimidine-2,4,6(1H,3H,5H)-trione (8a)**

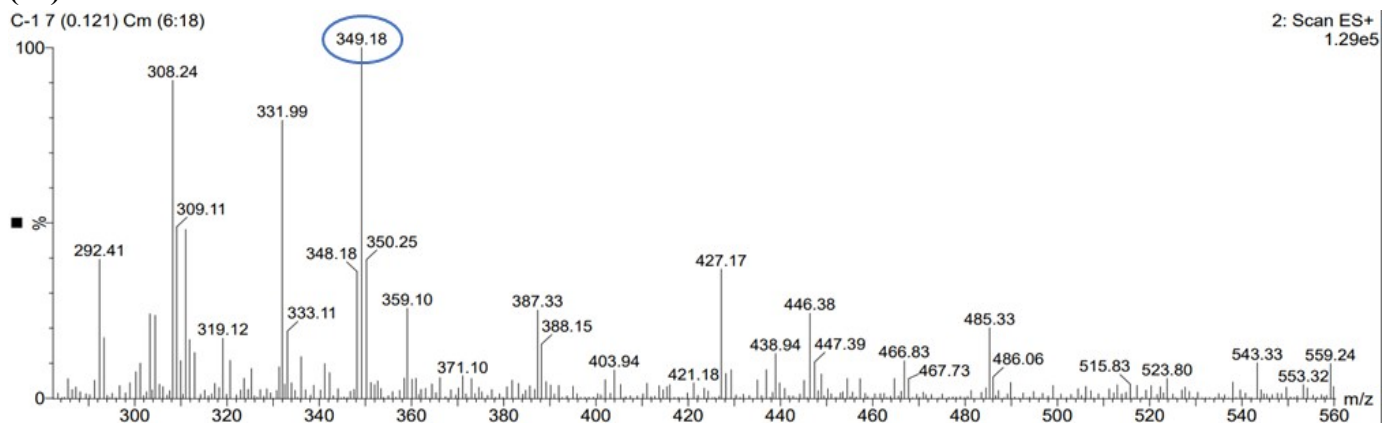

**<sup>1</sup>H-NMR of 5-(((9-ethyl-9H-carbazol-3-yl)amino)methylene)-1,3-dimethylpyrimidine-2,4,6(1H,3H,5H)-trione (8b)**

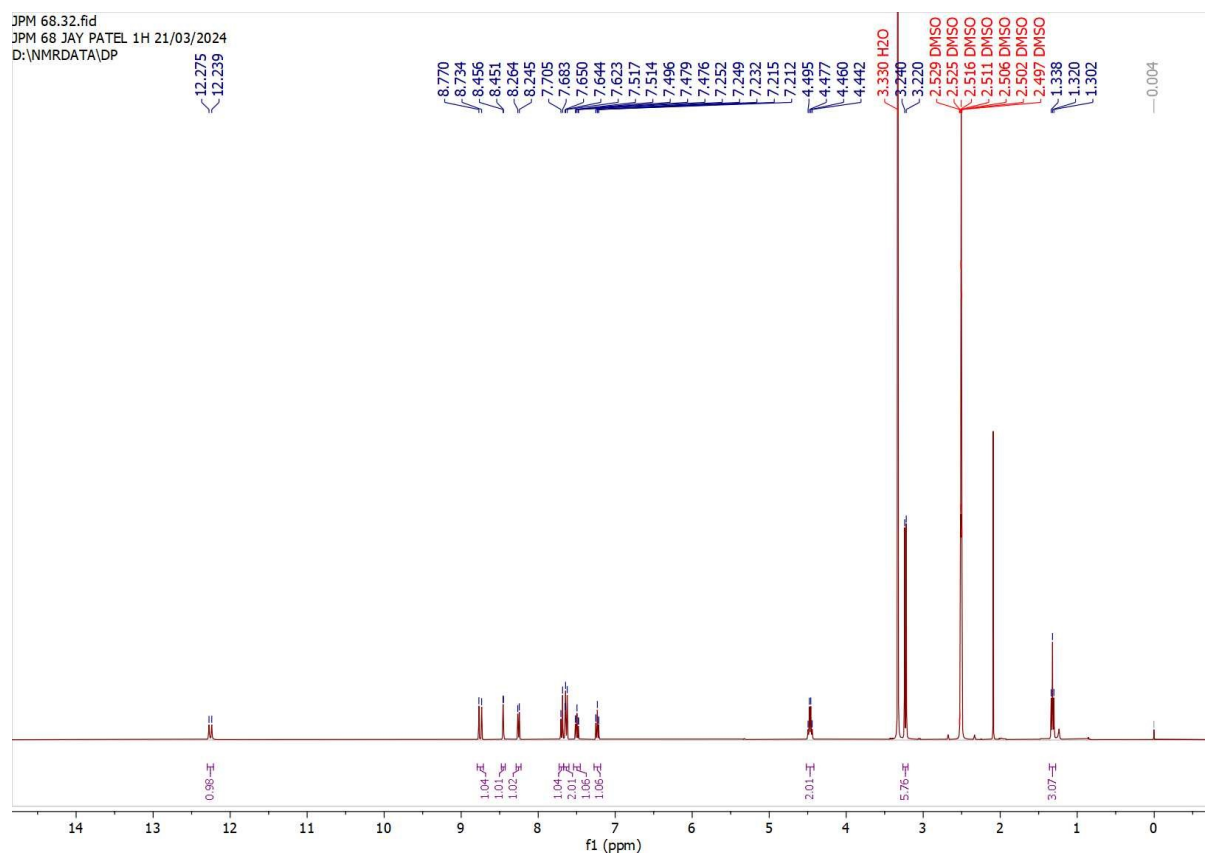

# <sup>13</sup>C-NMR of 5-(((9-ethyl-9H-carbazol-3-yl)amino)methylene)-1,3-dimethylpyrimidine-2,4,6(1H,3H,5H)-trione (**8b**)

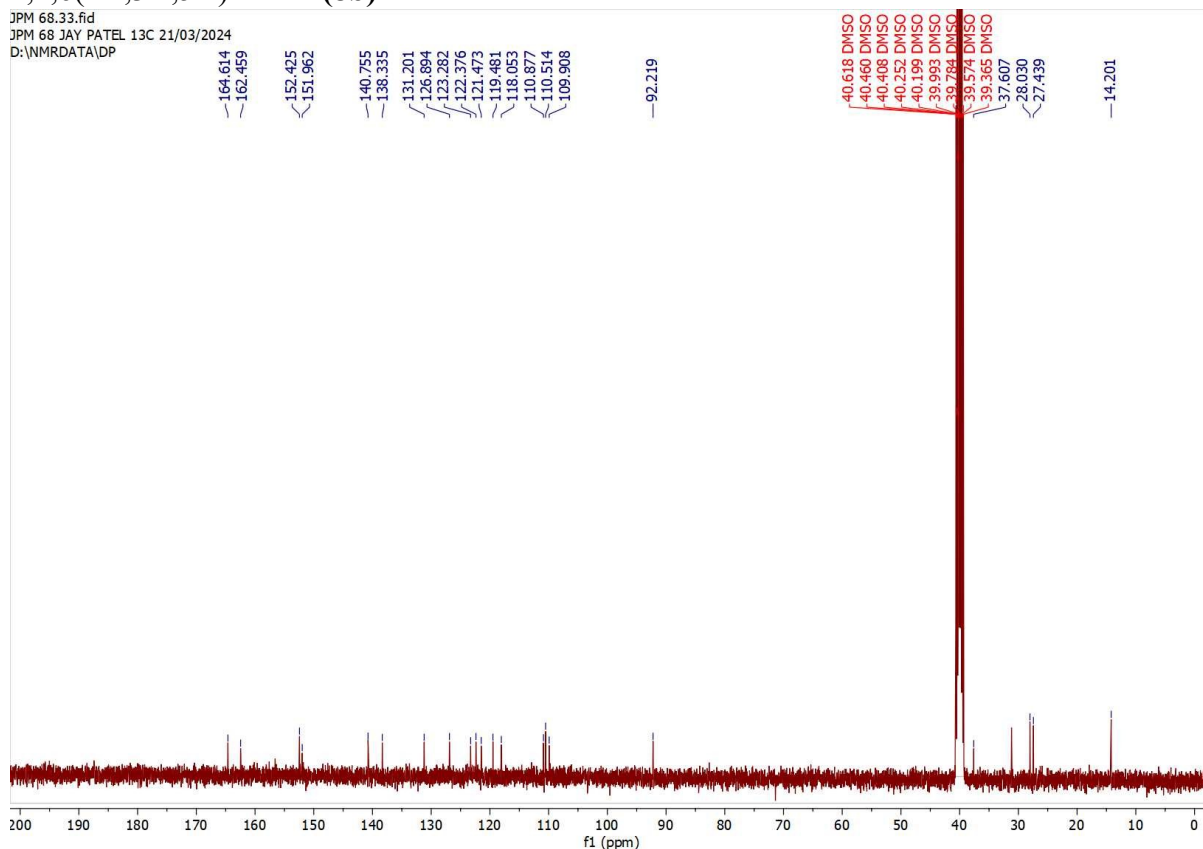

## Mass of 5-(((9-ethyl-9H-carbazol-3-yl)amino)methylene)-1,3-dimethylpyrimidine-2,4,6(1H,3H,5H)-trione (**8b**)

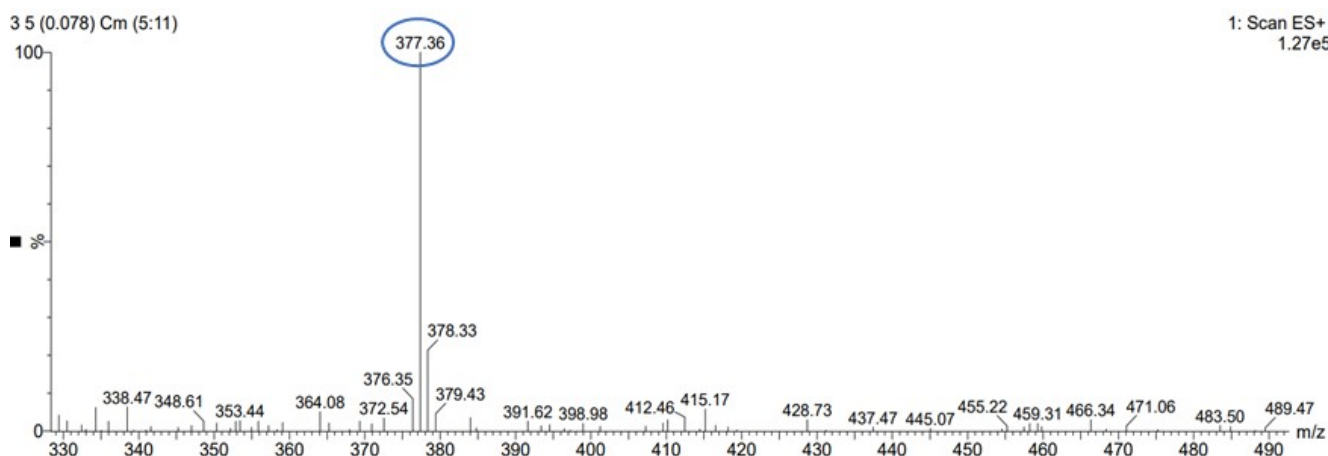

# <sup>1</sup>H-NMR of 5-(((9-ethyl-9H-carbazol-3-yl)amino)methylene)-2-thioxodihydropyrimidine-4,6(1H,5H)-dione (**8c**)

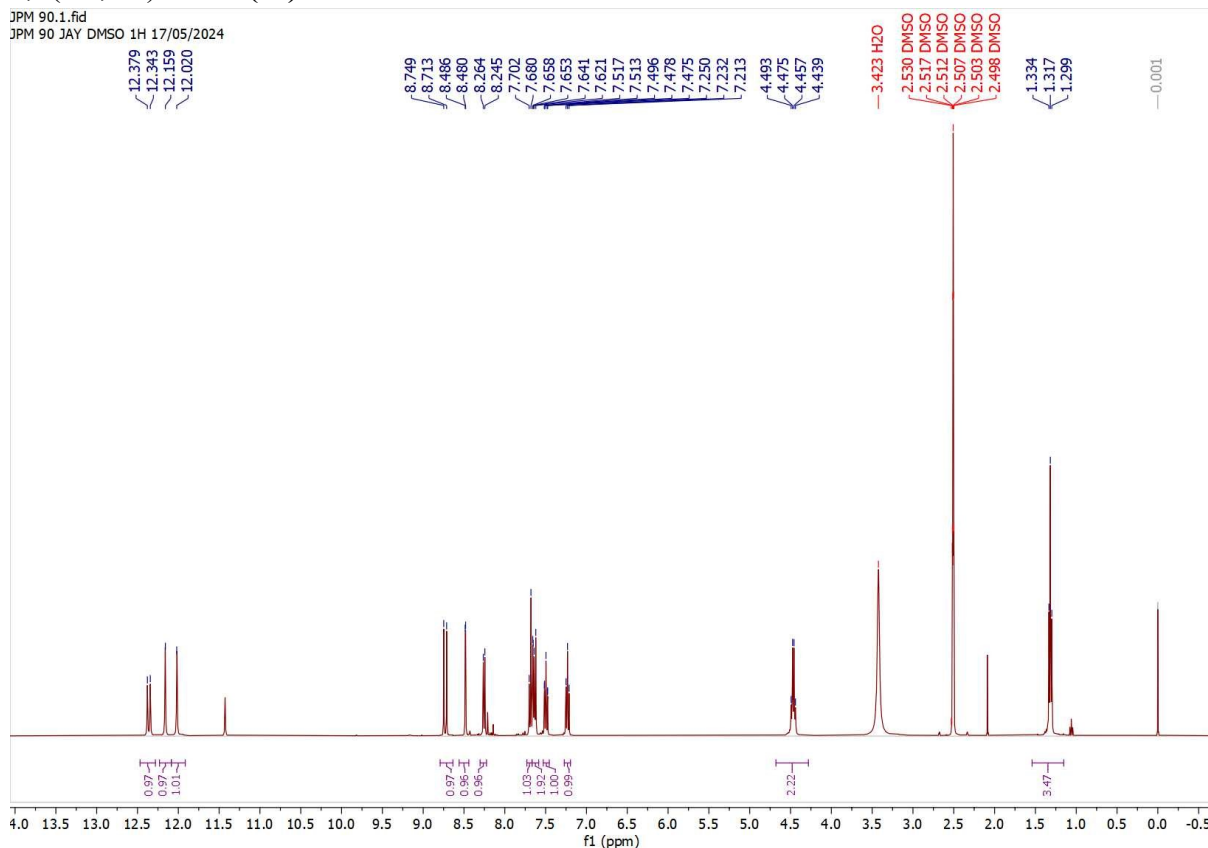

# <sup>13</sup>C-NMR of 5-(((9-ethyl-9H-carbazol-3-yl)amino)methylene)-2-thioxodihydropyrimidine-4,6(1H,5H)-dione (**8c**)

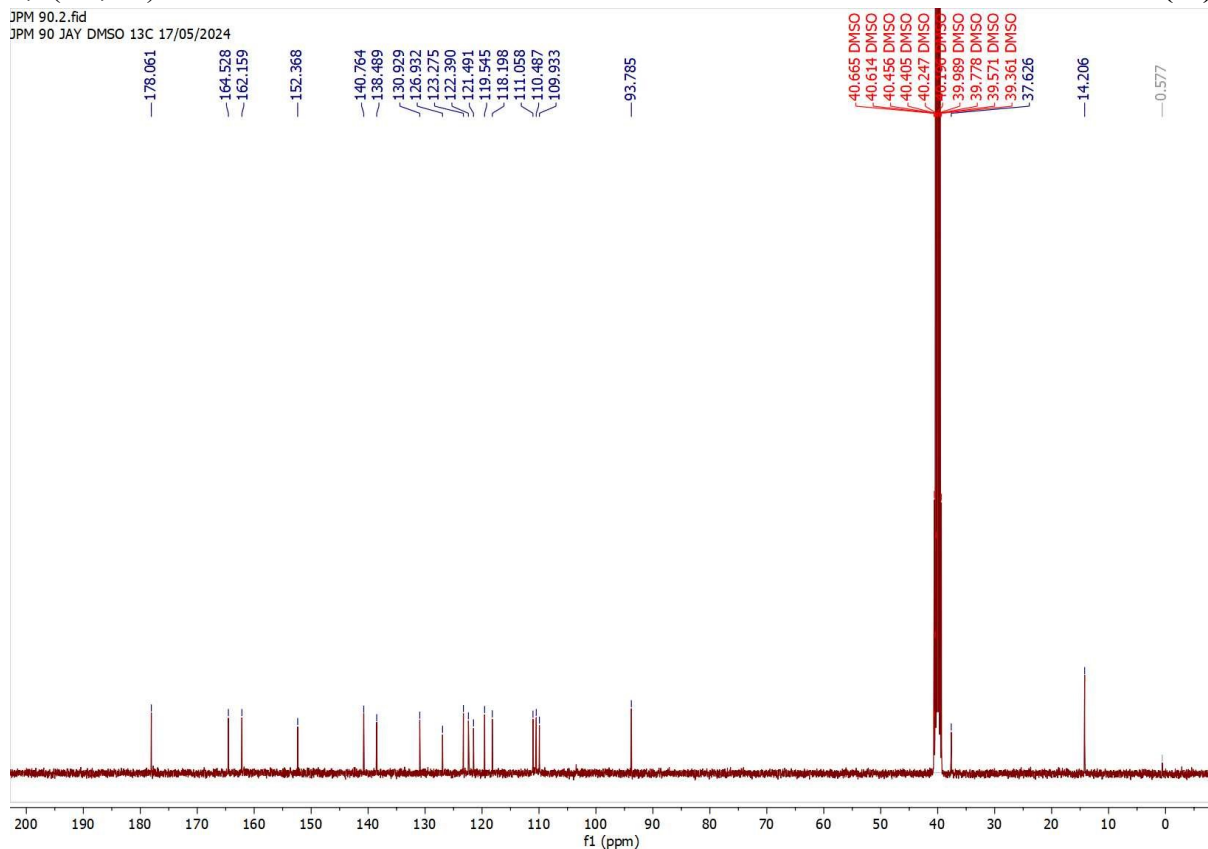

**Mass** of 5-(((9-ethyl-9H-carbazol-3-yl)amino)methylene)-2-thioxodihydropyrimidine-4,6(1H,5H)-dione (**8c**)

C-2 6 (0.104) Cm (5:11)

2: Scan ES+  
5.40e5

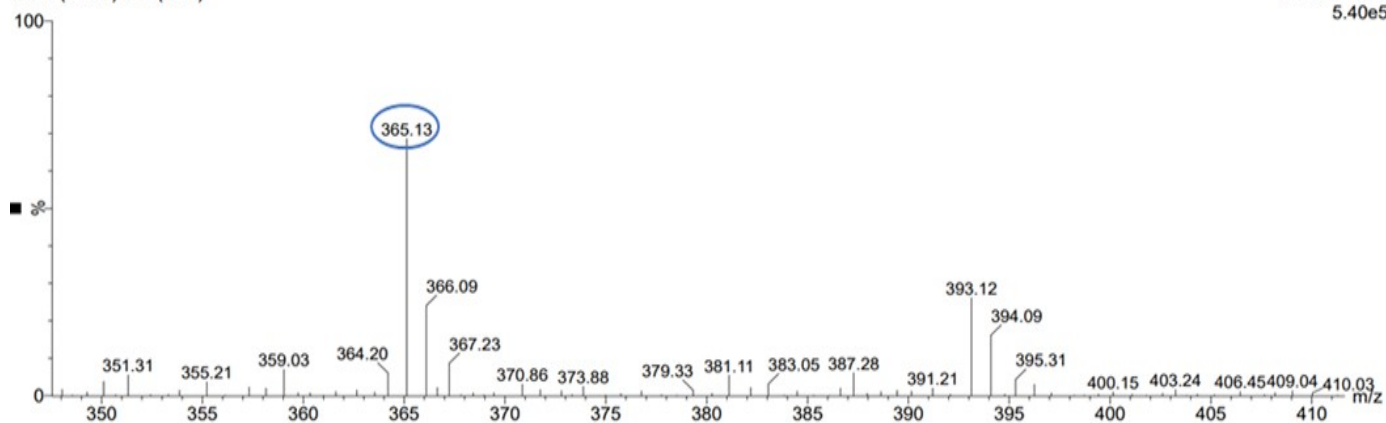

**<sup>1</sup>H-NMR** of 5-(((9-ethyl-9H-carbazol-3-yl)amino)methylene)-2,2-dimethyl-1,3-dioxane-4,6-dione (**8d**)

JPM 195 DBF MA.67.fid

JPM 195 DBF MA 1H CDCL3 JAY 27/05/2025

D/NMRDATA/DP

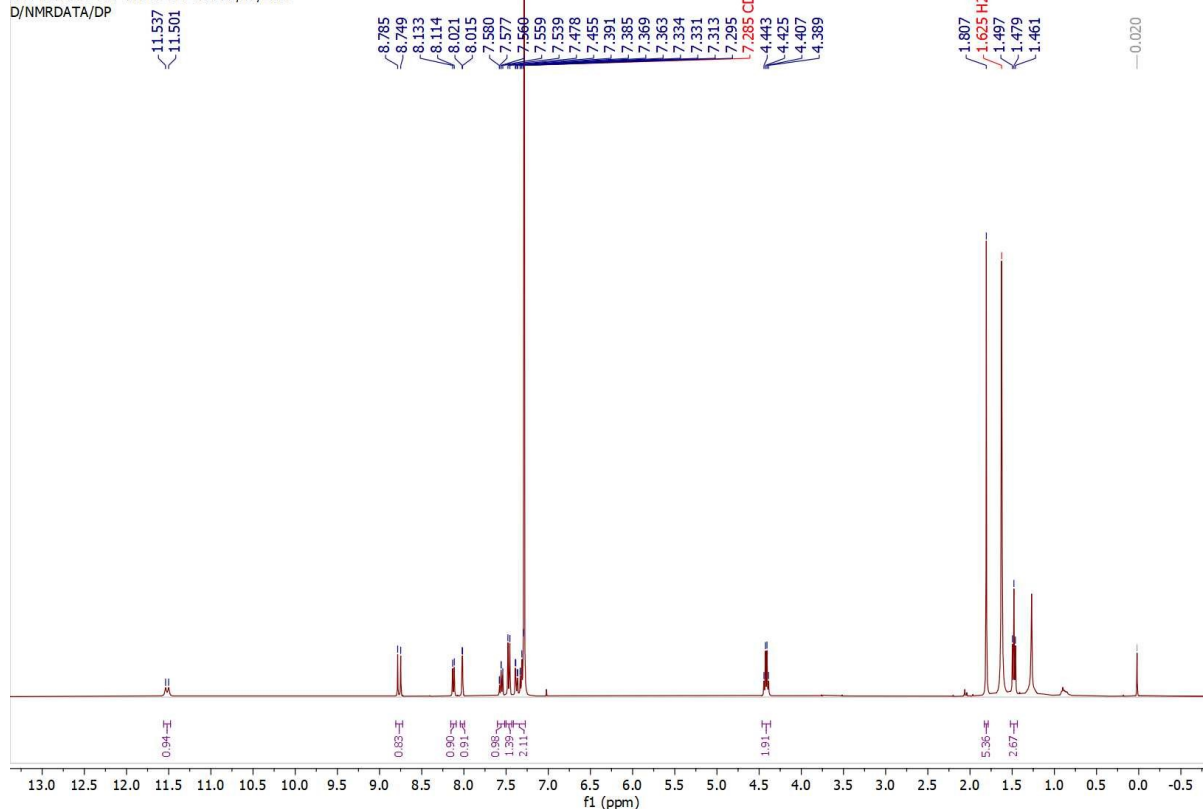

**<sup>13</sup>C-NMR of 5-(((9-ethyl-9H-carbazol-3-yl)amino)methylene)-2,2-dimethyl-1,3-dioxane-4,6-dione (8d)**

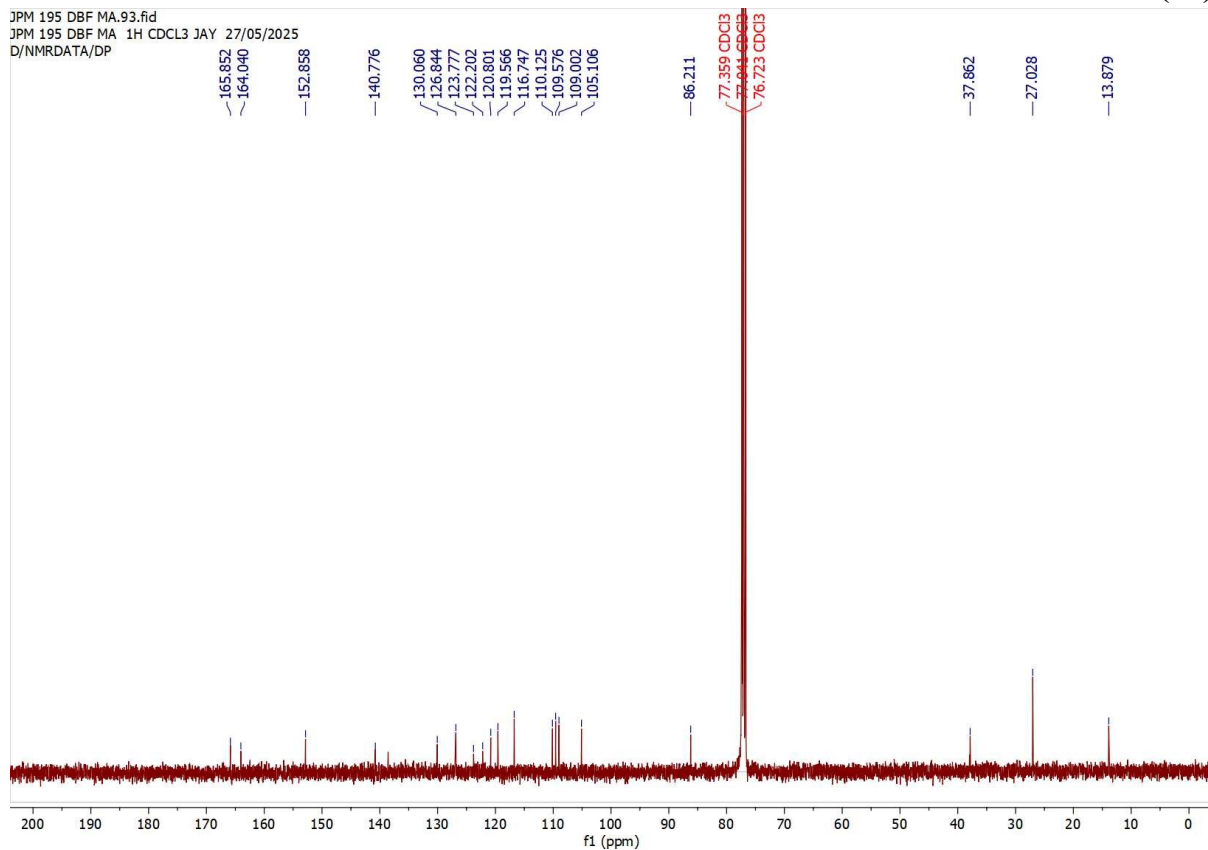

**Mass of 5-(((9-ethyl-9H-carbazol-3-yl)amino)methylene)-2,2-dimethyl-1,3-dioxane-4,6-dione (8d)**

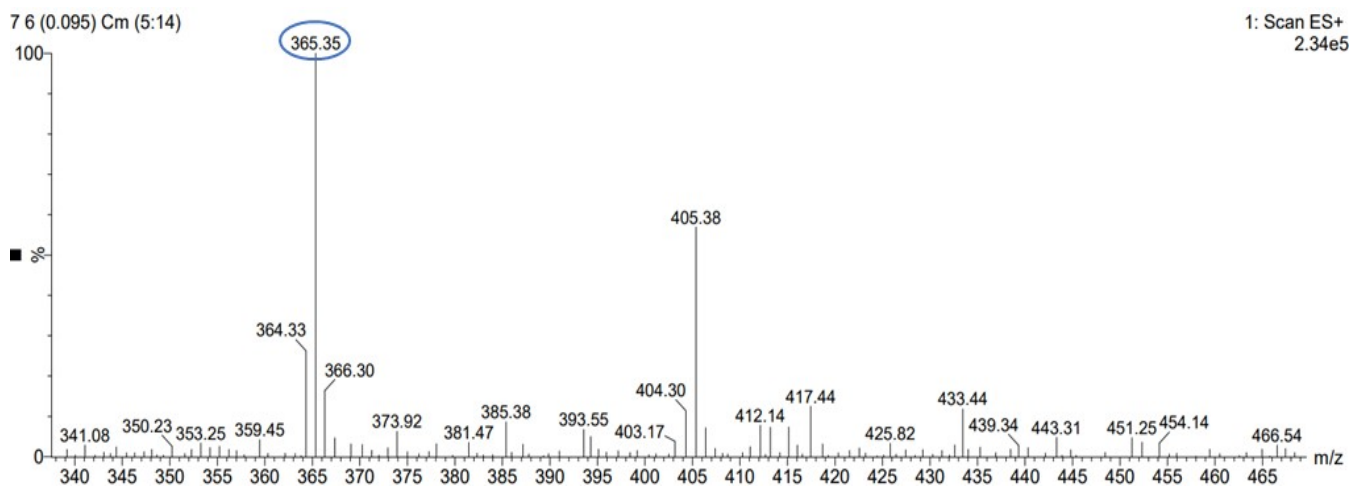

<sup>1</sup>H-NMR of (Z)-3-(((9-ethyl-9H-carbazol-3-yl)amino)methylene)chromane-2,4-dione (**8e**)

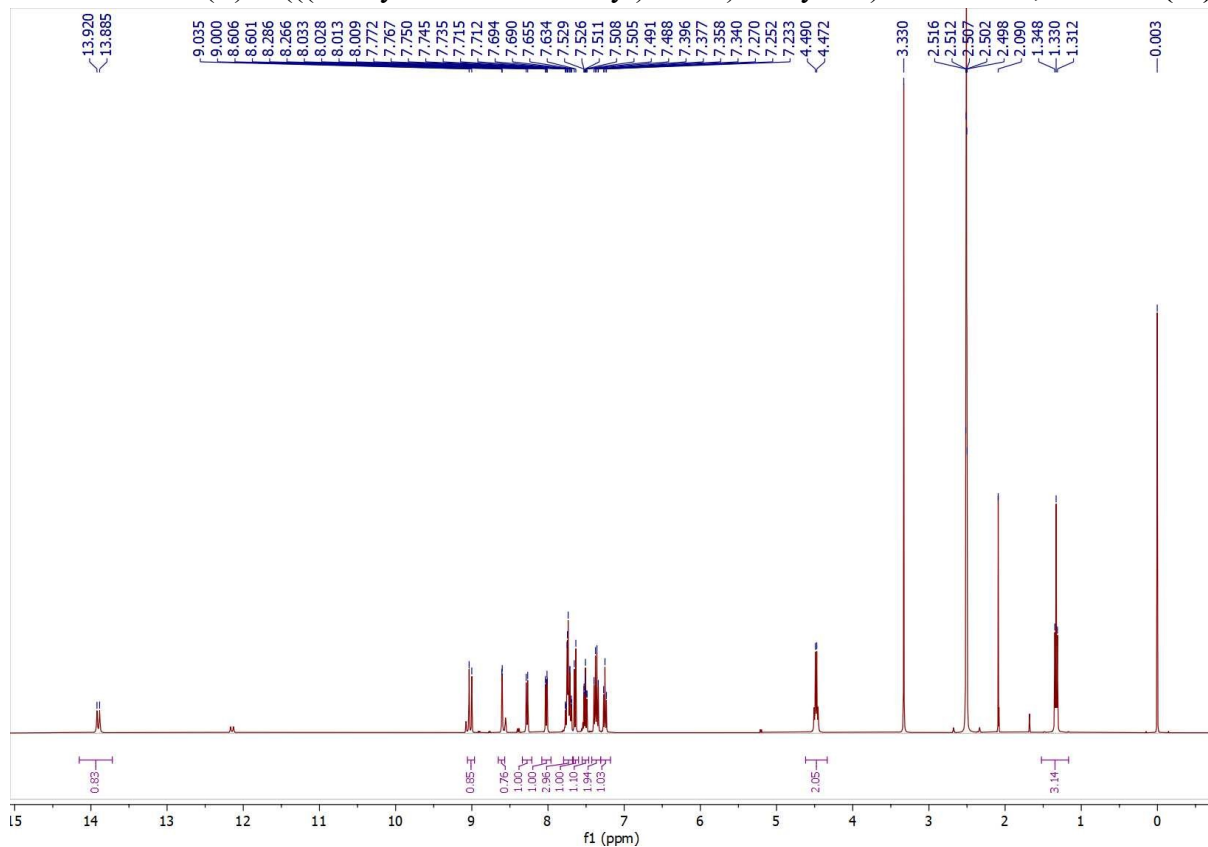

<sup>13</sup>C-NMR of (Z)-3-(((9-ethyl-9H-carbazol-3-yl)amino)methylene)chromane-2,4-dione (**8e**)

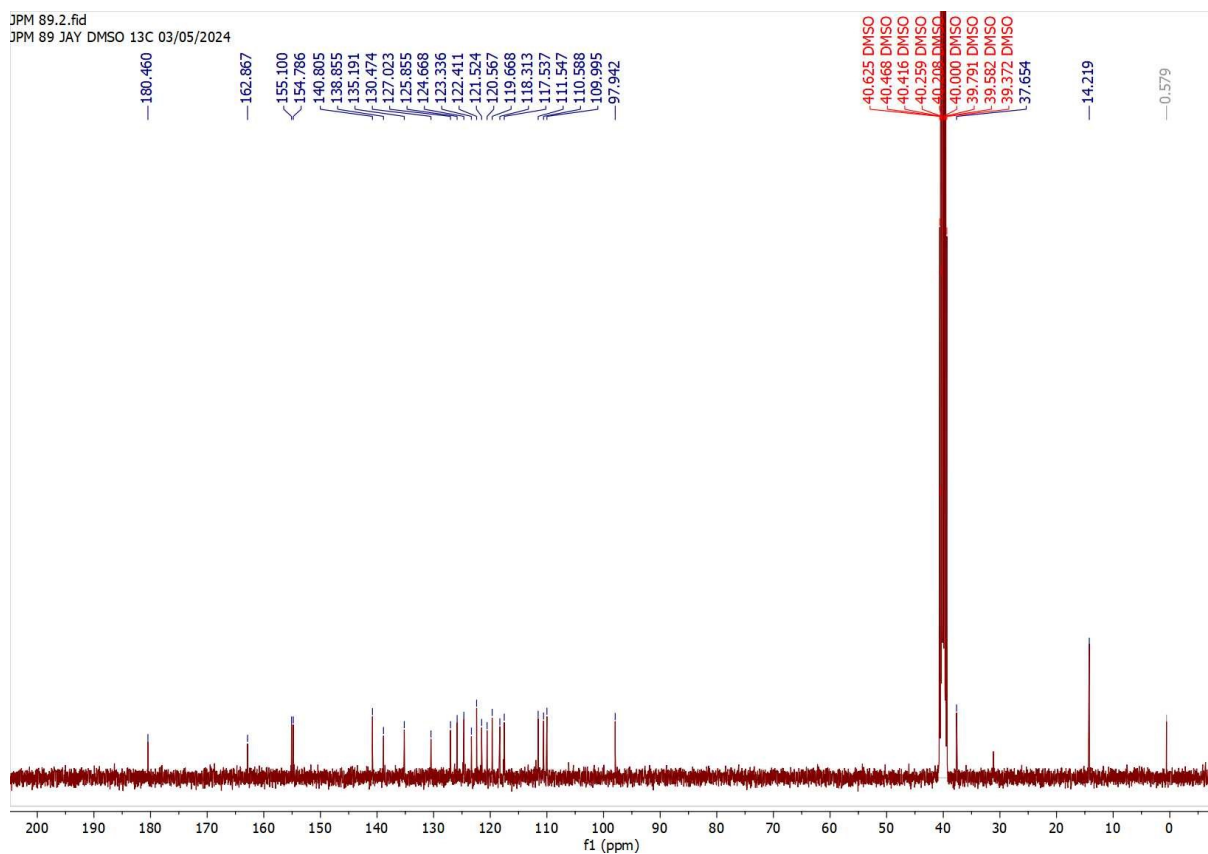

Mass of (Z)-3-(((9-ethyl-9H-carbazol-3-yl)amino)methylene)chromane-2,4-dione (**8e**)

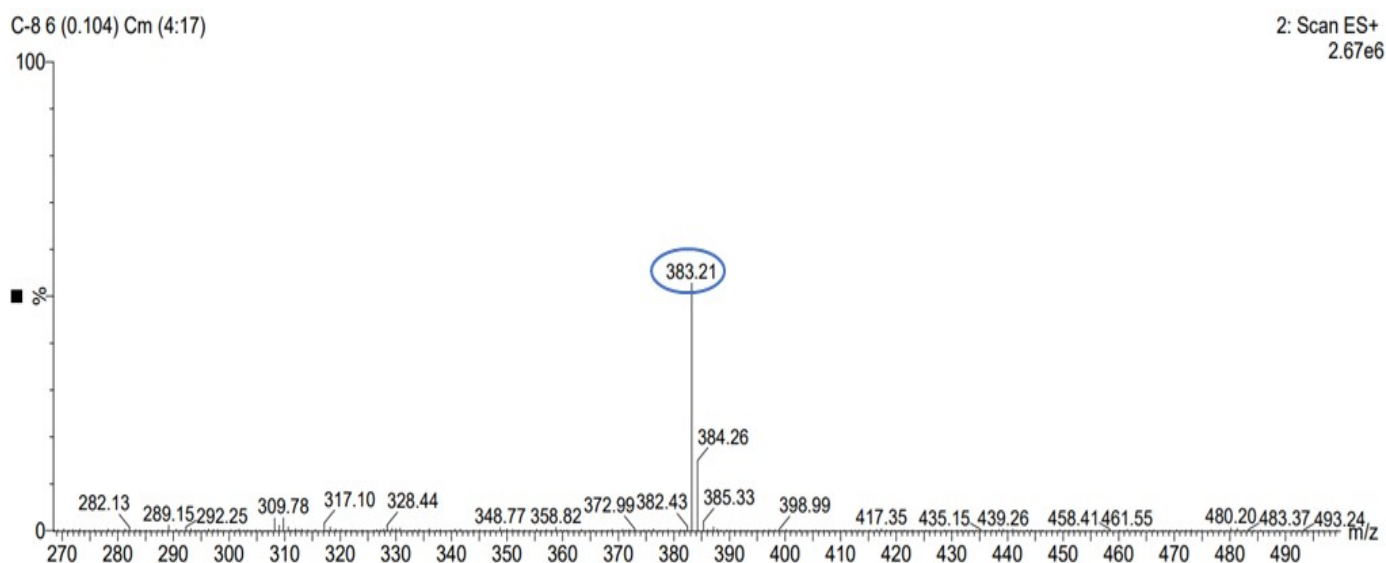

<sup>1</sup>H-NMR (Z)-2-(benzo[d]thiazol-2-yl)-3-(((9-ethyl-9H-carbazol-3-yl)amino)acrylonitrile (**8f**)

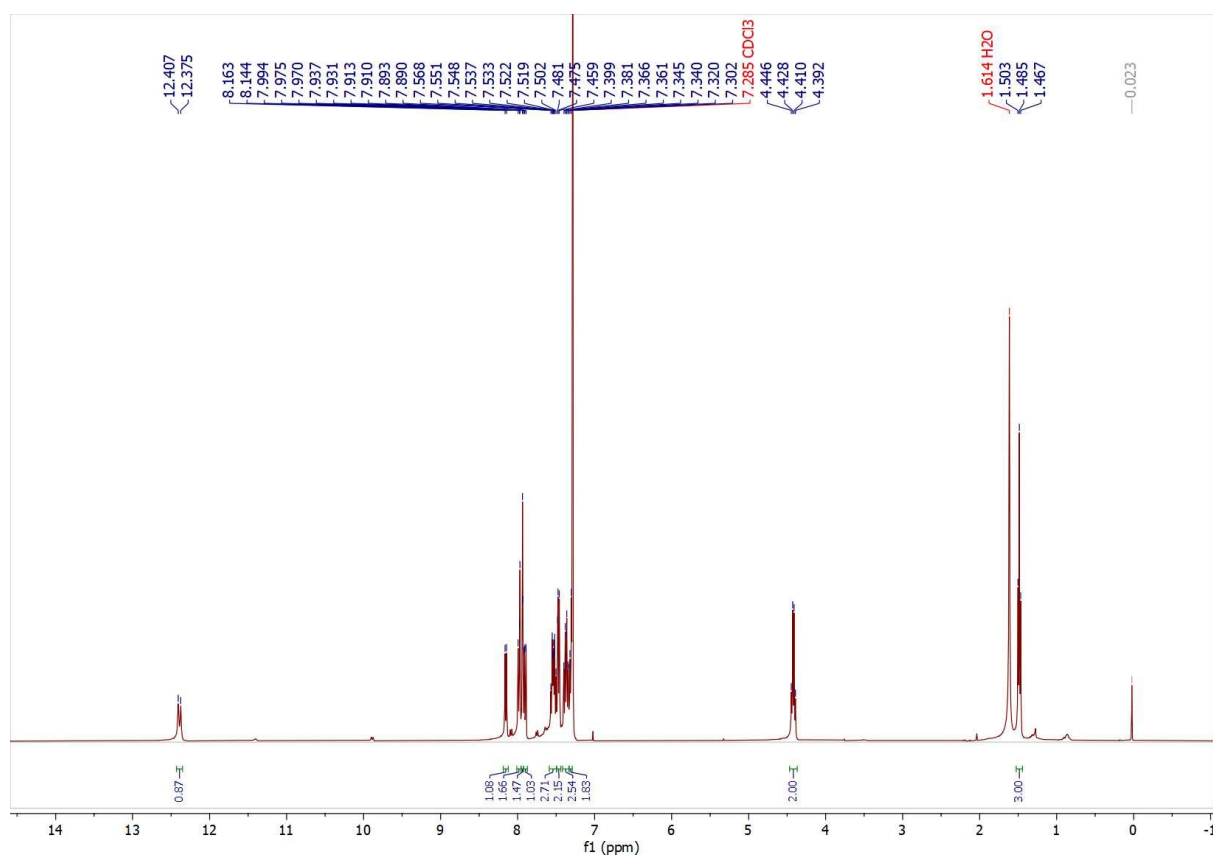

**<sup>13</sup>C-NMR of (Z)-2-(benzo[d]thiazol-2-yl)-3-((9-ethyl-9H-carbazol-3-yl)amino)acrylonitrile (8f)**

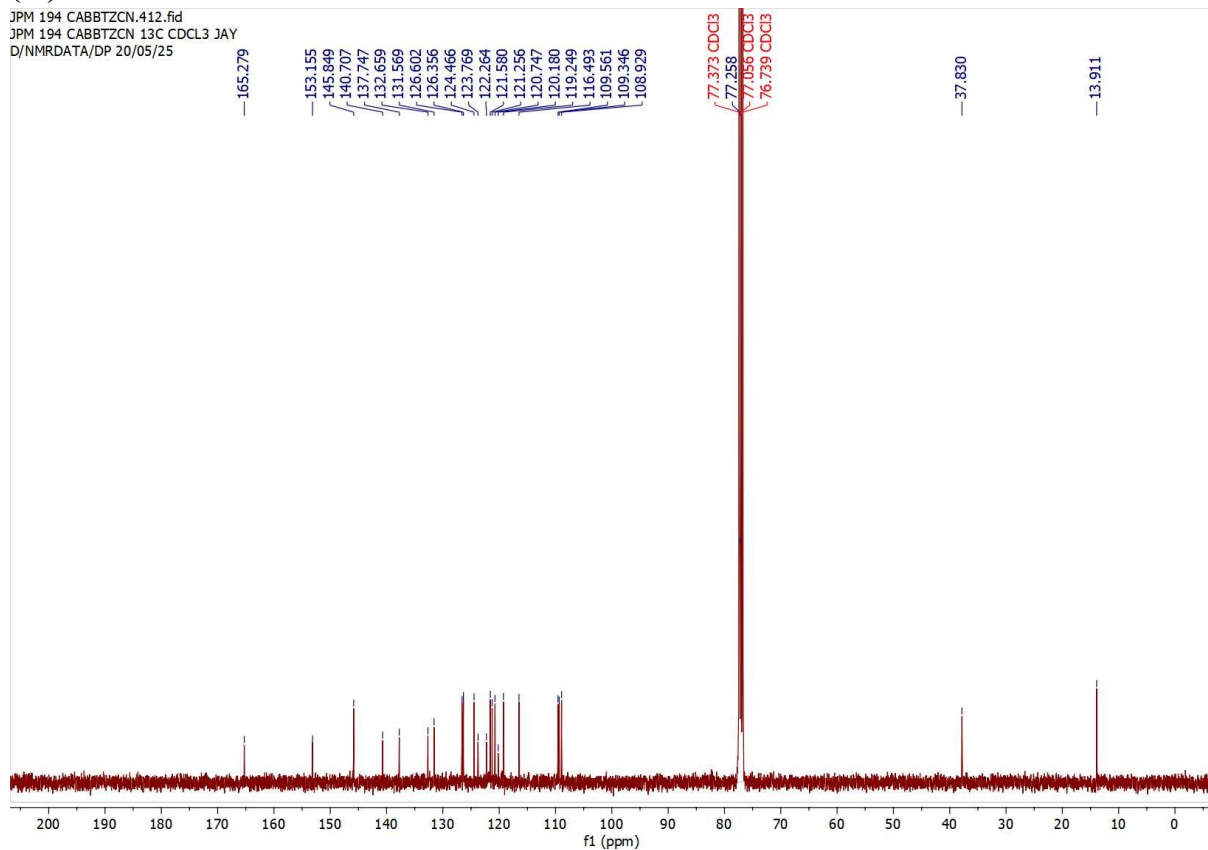

**Mass of (Z)-2-(benzo[d]thiazol-2-yl)-3-((9-ethyl-9H-carbazol-3-yl)amino)acrylonitrile (8f)**

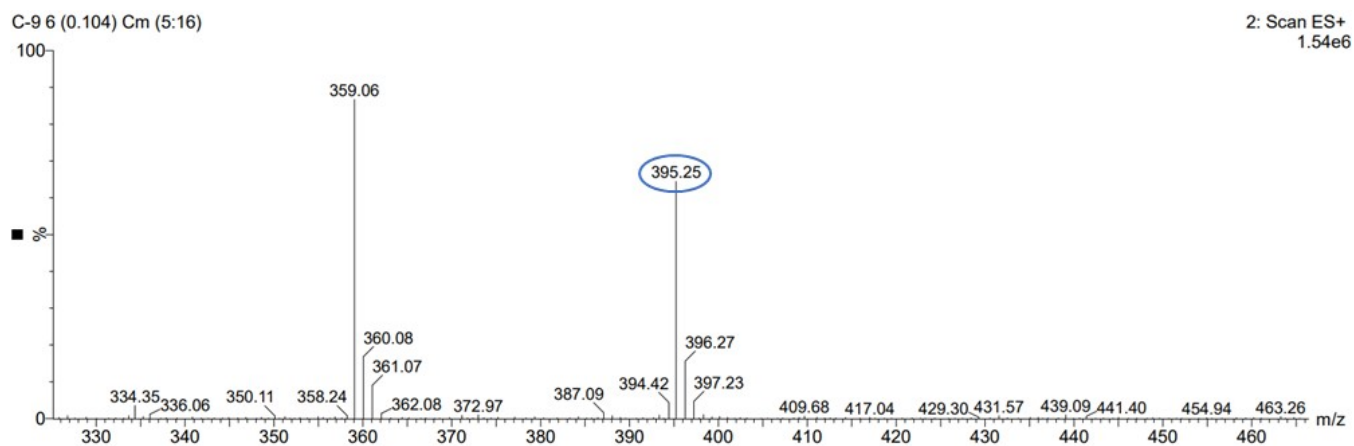

**<sup>1</sup>H-NMR of 5-(2-(9-ethyl-9H-carbazol-3-yl)hydrazineylidene)pyrimidine-2,4,6(1H,3H,5H)-trione (9a)**

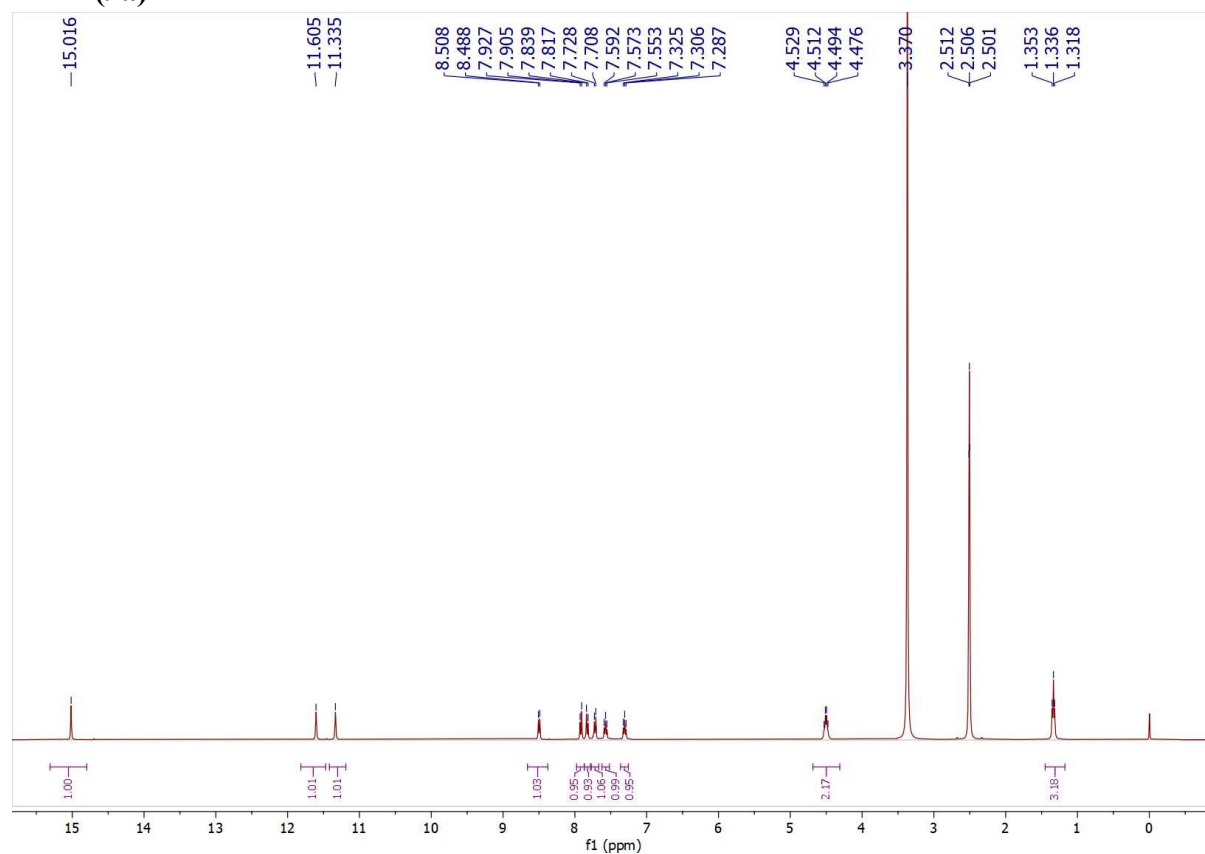

**<sup>13</sup>C-NMR of 5-(2-(9-ethyl-9H-carbazol-3-yl)hydrazineylidene)pyrimidine-2,4,6(1H,3H,5H)-trione (9a)**

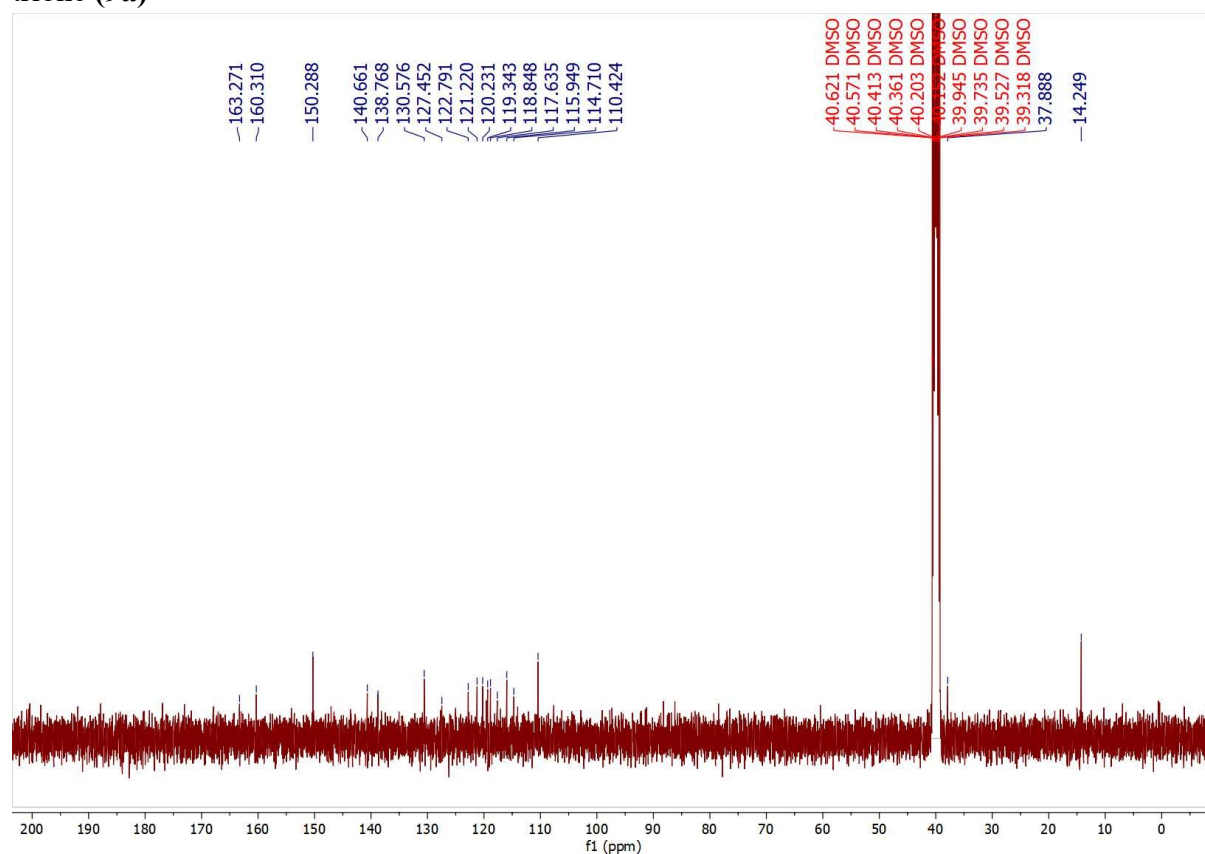

**Mass of 5-(2-(9-ethyl-9H-carbazol-3-yl)hydrazineylidene)pyrimidine-2,4,6(1H,3H,5H)-trione (9a)**

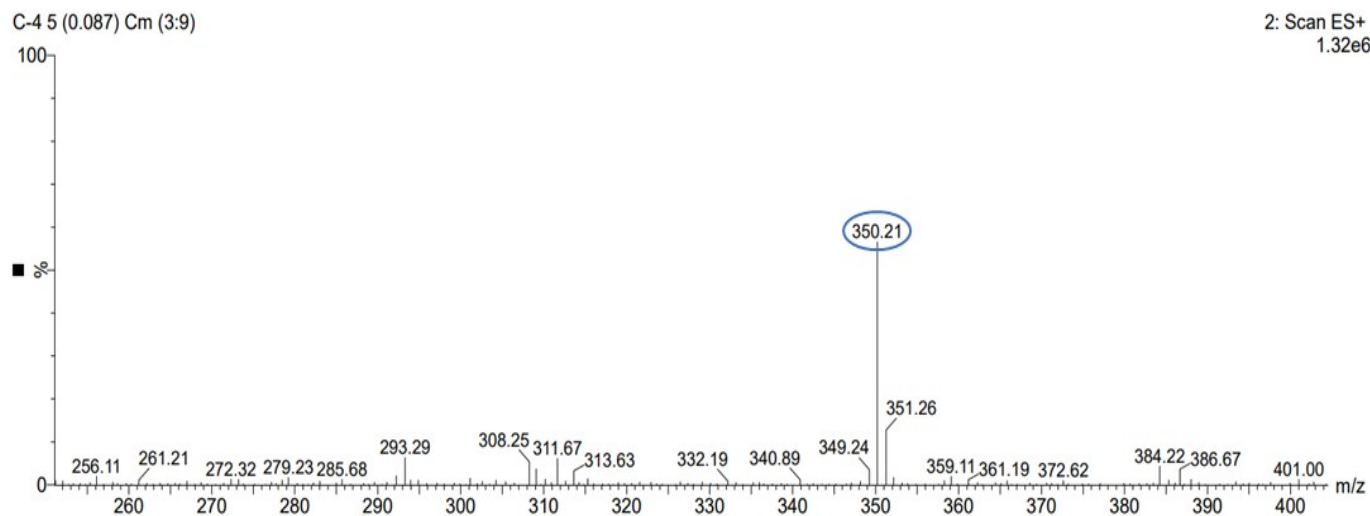

**<sup>1</sup>H-NMR of 5-(2-(9-ethyl-9H-carbazol-3-yl)hydrazineylidene)-1,3-dimethylpyrimidine-2,4,6(1H,3H,5H)-trione (9b)**

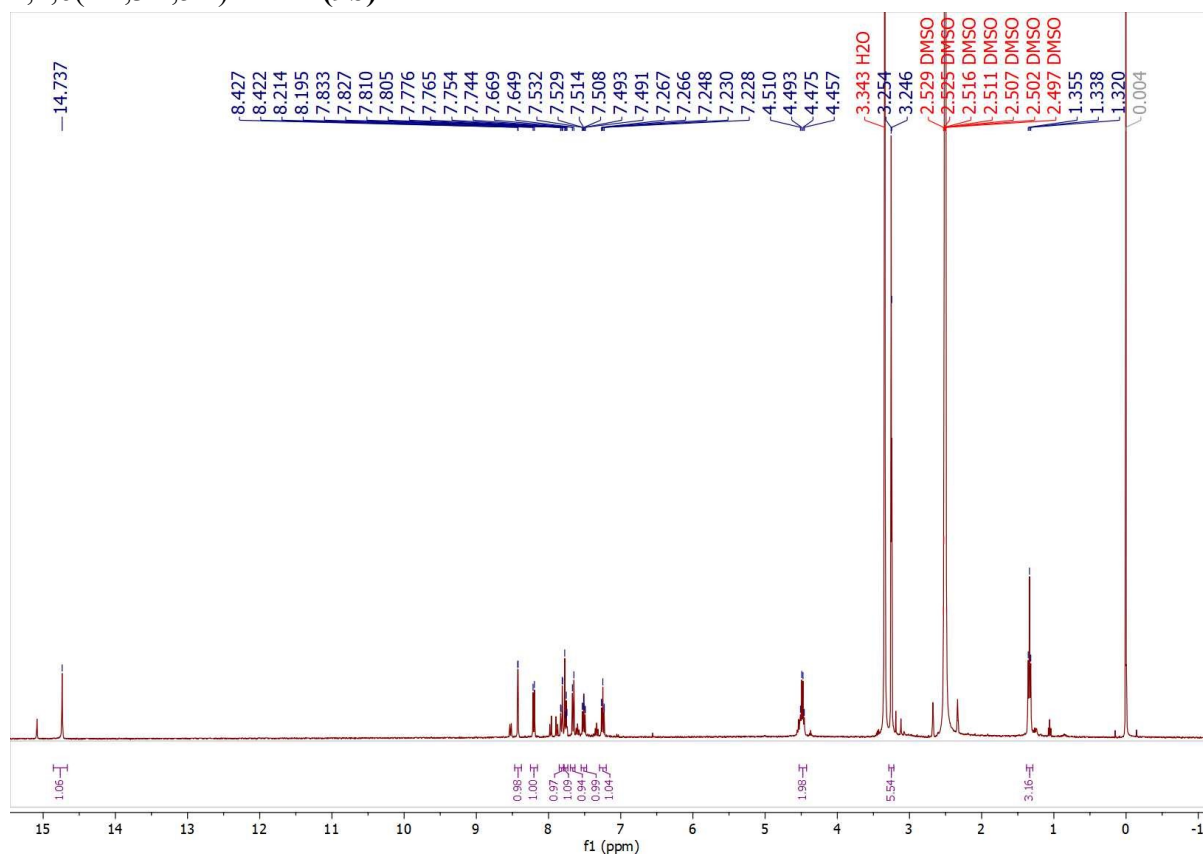

**Mass** of 5-(2-(9-ethyl-9H-carbazol-3-yl)hydrazineylidene)-1,3-dimethylpyrimidine-2,4,6(1H,3H,5H)-trione (**9b**)

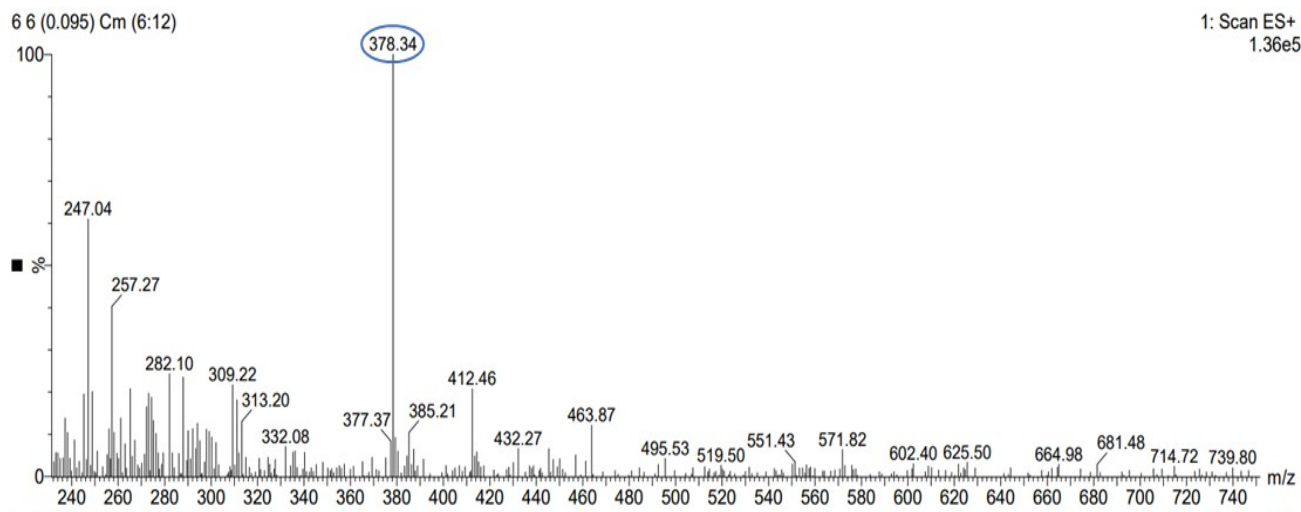

**<sup>1</sup>H-NMR** of 5-(2-(9-ethyl-9H-carbazol-3-yl)hydrazineylidene)-2-thioxodihydropyrimidine-4,6(1H,5H)-dione (**9c**)

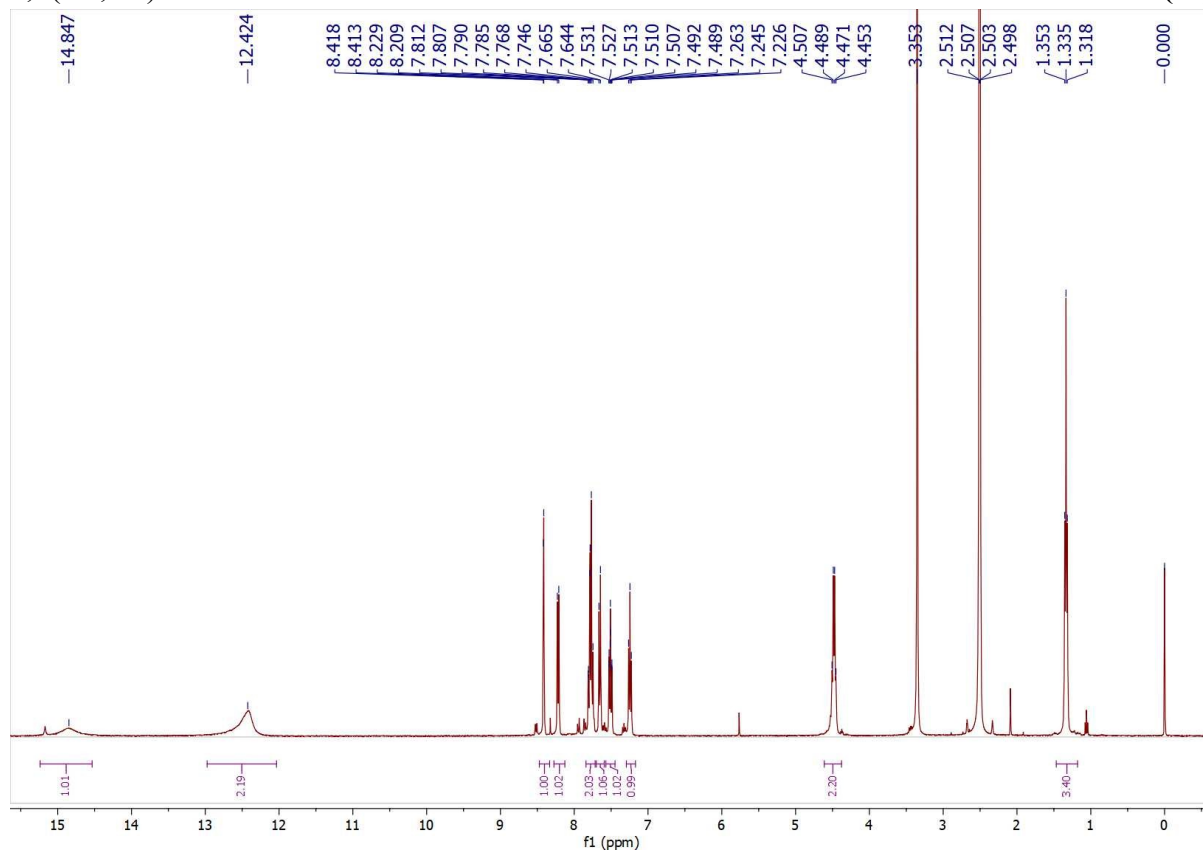

**$^{13}\text{H-NMR}$  of 5-(2-(9-ethyl-9H-carbazol-3-yl)hydrazineylidene)-2-thioxodihydropyrimidine-4,6(1H,5H)-dione (9c)**

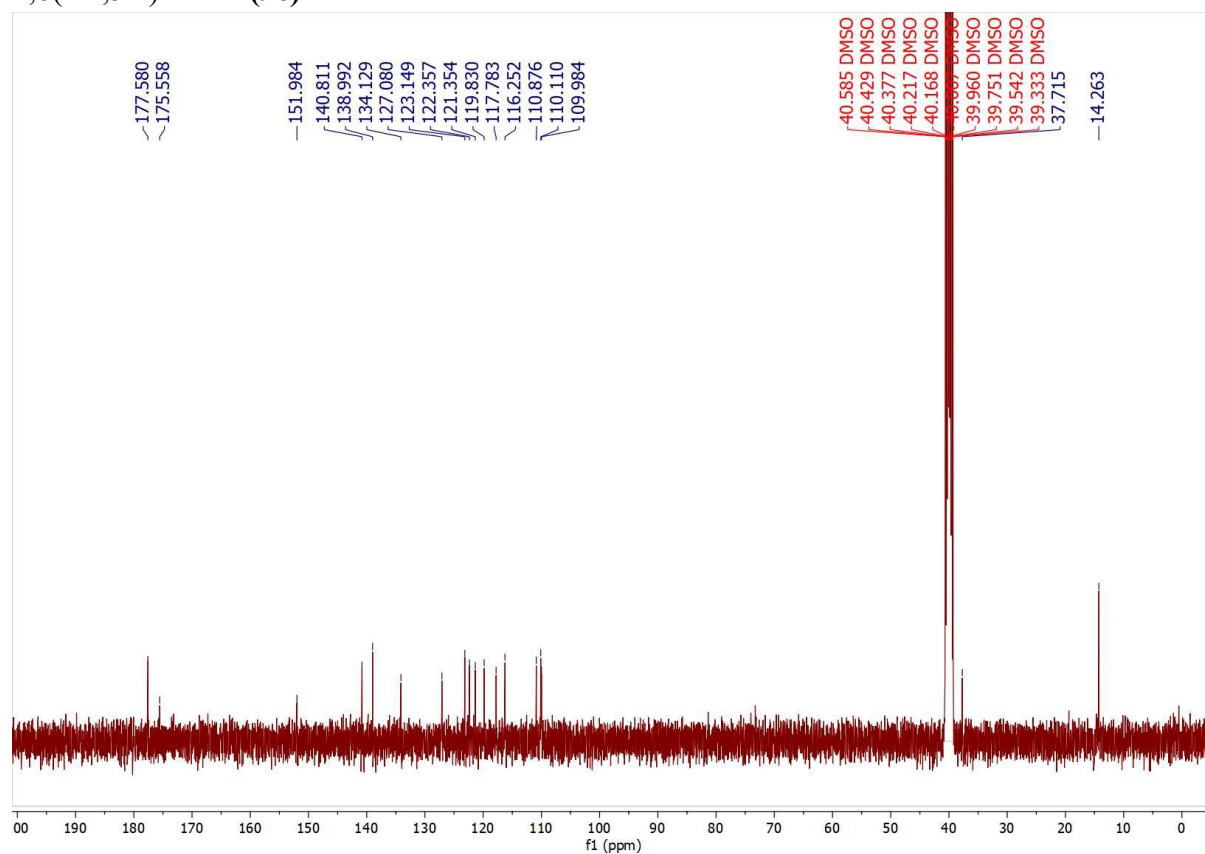

**Mass of 5-(2-(9-ethyl-9H-carbazol-3-yl)hydrazineylidene)-2-thioxodihydropyrimidine-4,6(1H,5H)-dione (9c)**

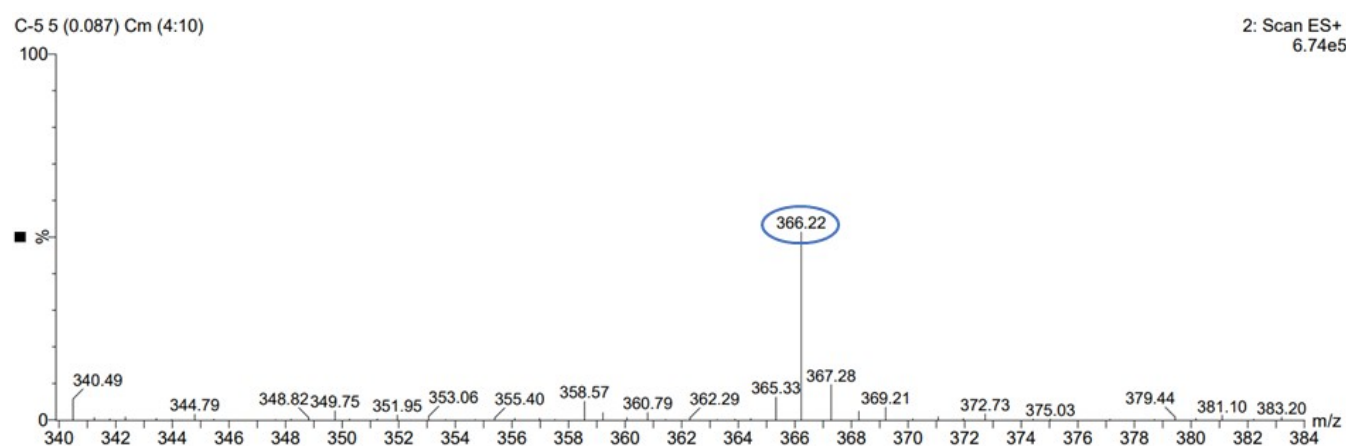

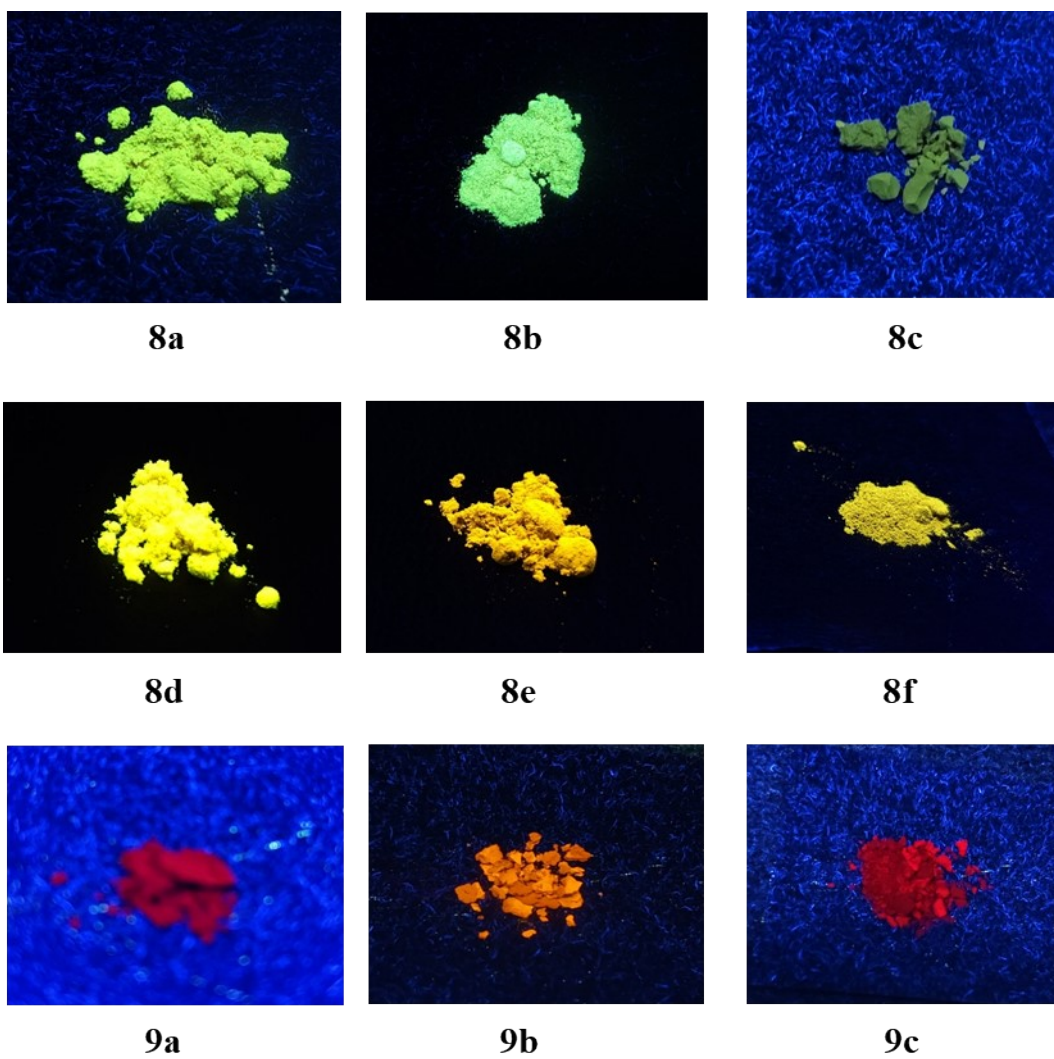

**Figure S1:** AIE of compounds **8a-f** and compounds **9a-c** in solid state under long UV light. **Fig**

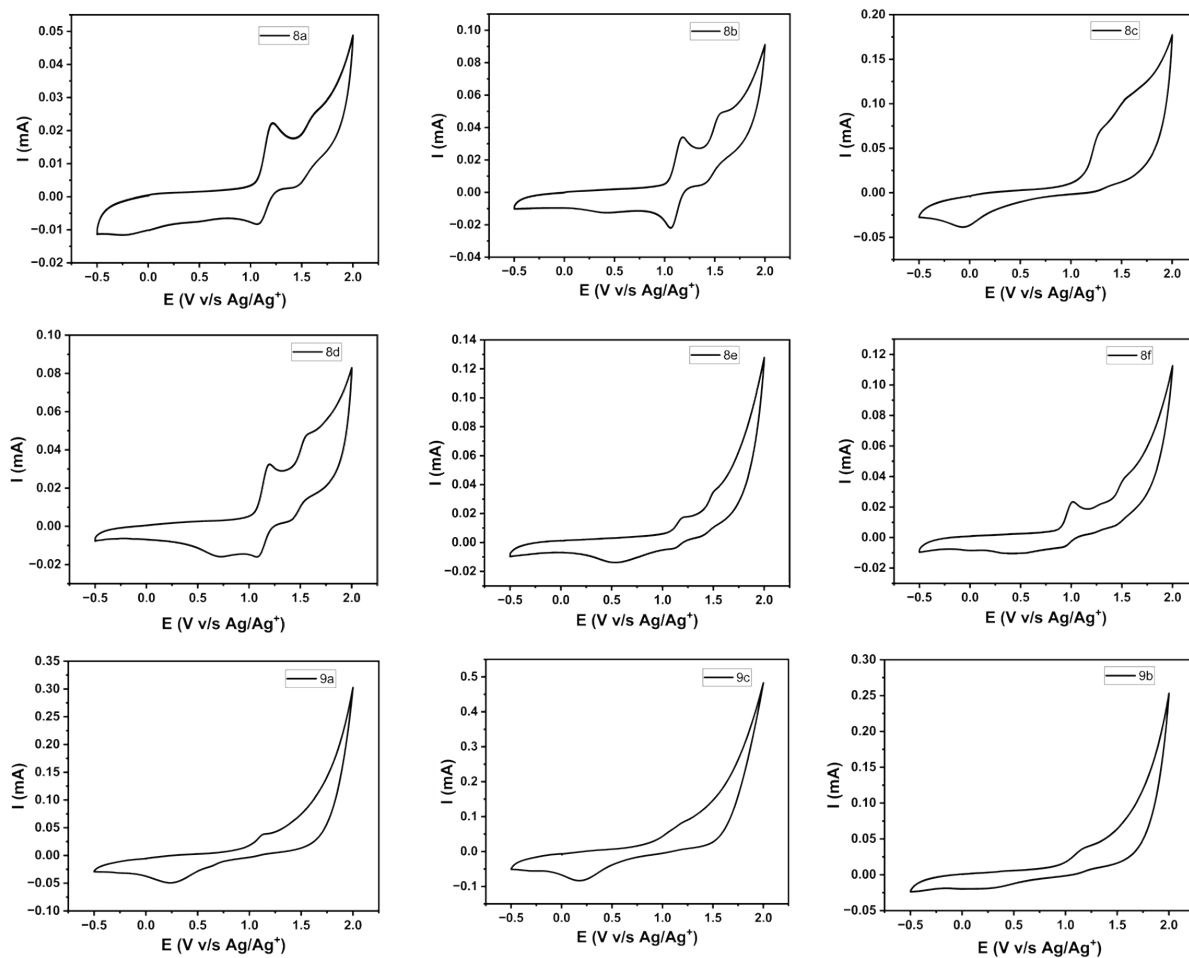

**Figure S2:** Cyclic voltammetry data of compounds **8a-f** and **9a-c**.

**Table S1:**

| Compd     |                         | $\lambda_{\text{abs}}^{\text{a}}$ | $\lambda_{\text{emi}}^{\text{b}}$ | $\Delta\nu^{\text{c}}$ |
|-----------|-------------------------|-----------------------------------|-----------------------------------|------------------------|
|           |                         | nm                                | nm                                | nm                     |
| <b>8d</b> | <b>Acetone</b>          | 343                               | 435                               | 92                     |
|           | <b>ACN</b>              | 343                               | 485                               | <b>142</b>             |
|           | <b>CHCl<sub>3</sub></b> | 347                               | 435                               | 88                     |
|           | <b>DMSO</b>             | 347                               | 485                               | 138                    |
| <b>8e</b> | <b>Acetone</b>          | 403                               | 521                               | 118                    |
|           | <b>ACN</b>              | 403                               | 530                               | <b>127</b>             |
|           | <b>CHCl<sub>3</sub></b> | 409                               | 511                               | 102                    |
|           | <b>DMSO</b>             | 410                               | 537                               | <b>127</b>             |
| <b>8f</b> | <b>Acetone</b>          | 396                               | 501                               | 105                    |
|           | <b>ACN</b>              | 398                               | 540                               | <b>142</b>             |
|           | <b>CHCl<sub>3</sub></b> | 396                               | 502                               | 106                    |
|           | <b>DMSO</b>             | 403                               | 504                               | 101                    |

<sup>a</sup>Absorption maxima; <sup>b</sup>Emission maxima; <sup>c</sup>Stokes shift;

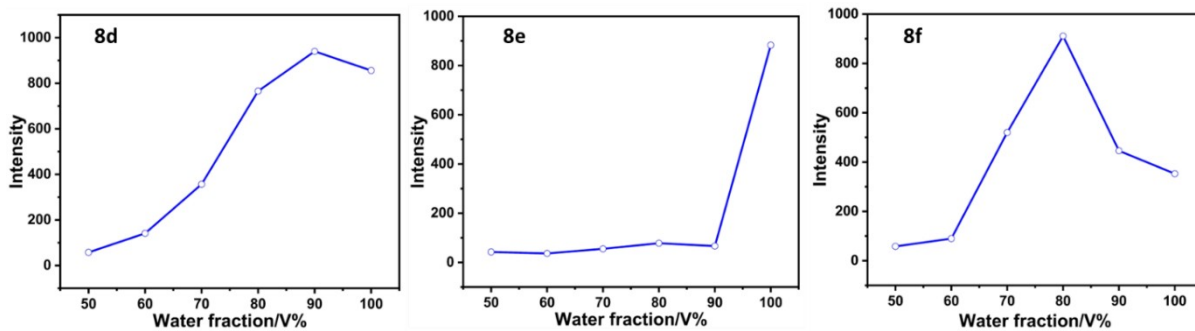

**Figure S3:** AIEE data of compounds **8b**, **8d** and **8f** at different fractions of water in DMSO.

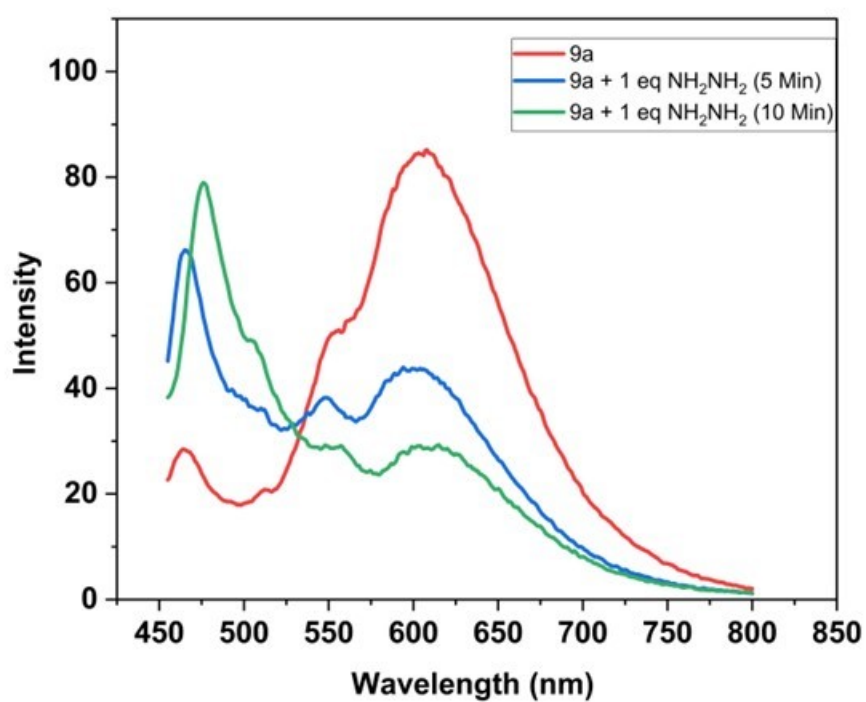

**Figure S4:** Change in fluorescence data of compounds **9a** with 1.0 eq of hydrazine in DMSO from time = 5 min and 10 min.

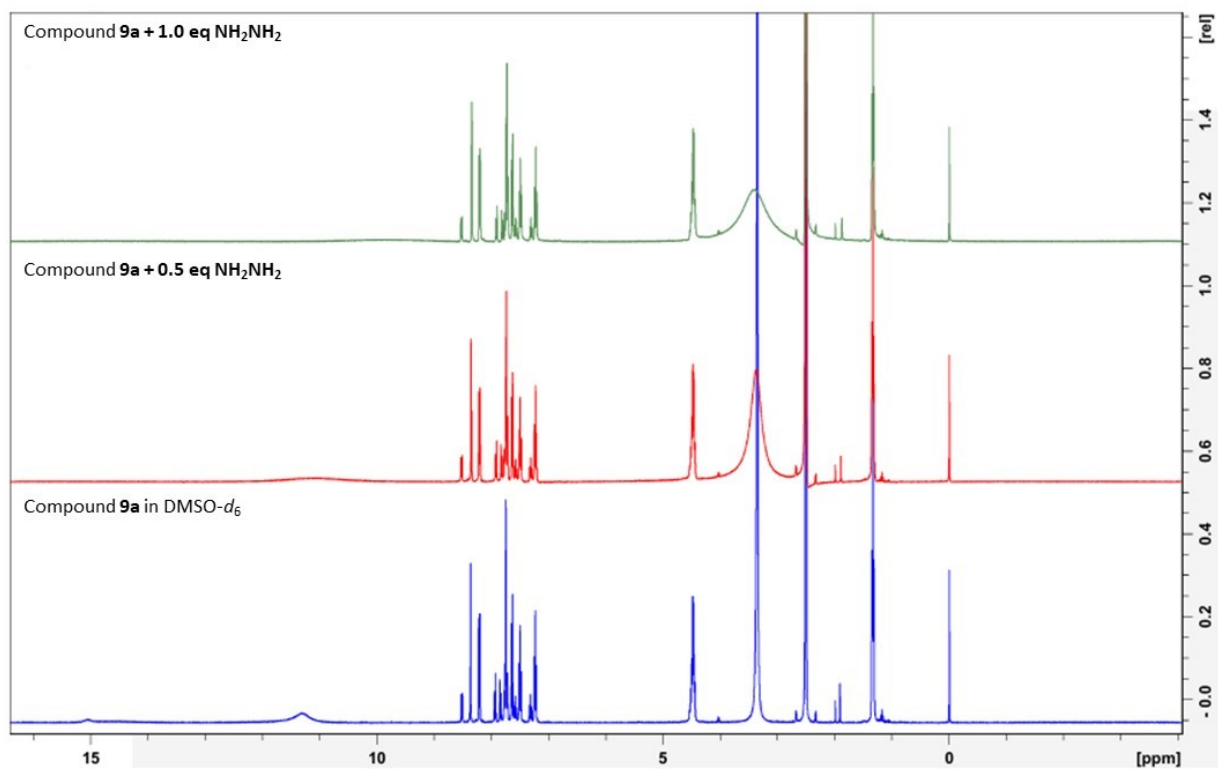

**Figure S5:** <sup>1</sup>H- NMR spectral changes of compound **9a** in DMSO-*d*<sub>6</sub> upon subsequent addition of hydrazine

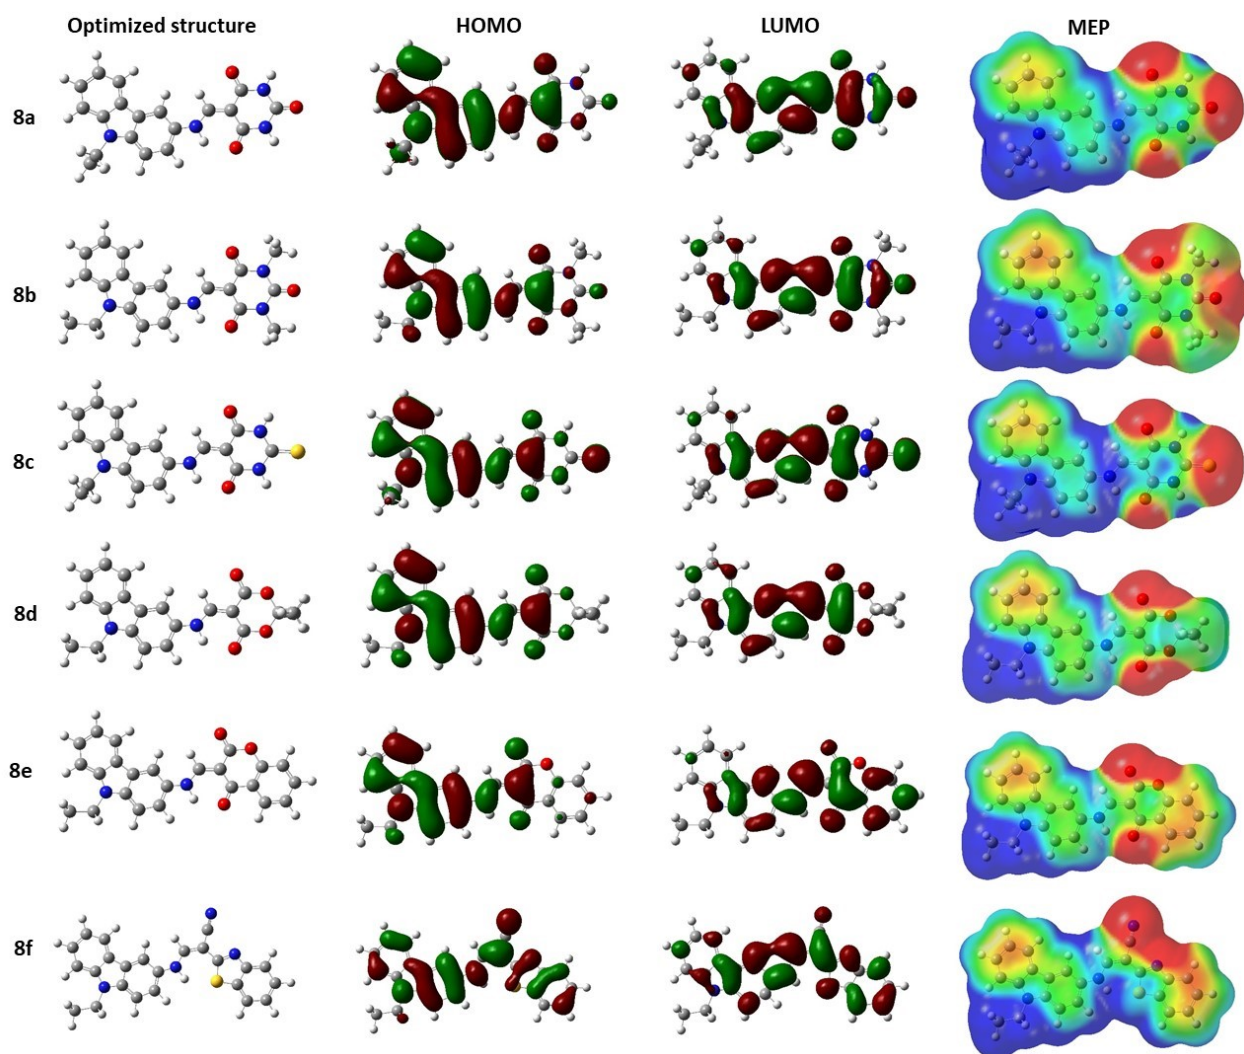

**Figure S6:** For compounds **8a-f** (a) Optimized ground state structure (b) Frontiers molecular orbitals (HOMO and LUMO) diagrams obtained from DFT calculations at B3LYP/6-311 G++ (d,p) level (c) Electrostatic potentials calculated in the range from  $-2.0 \times 10^{-3}$  (red) to  $2.0 \times 10^{-3}$  (blue) using optimized ground state structures

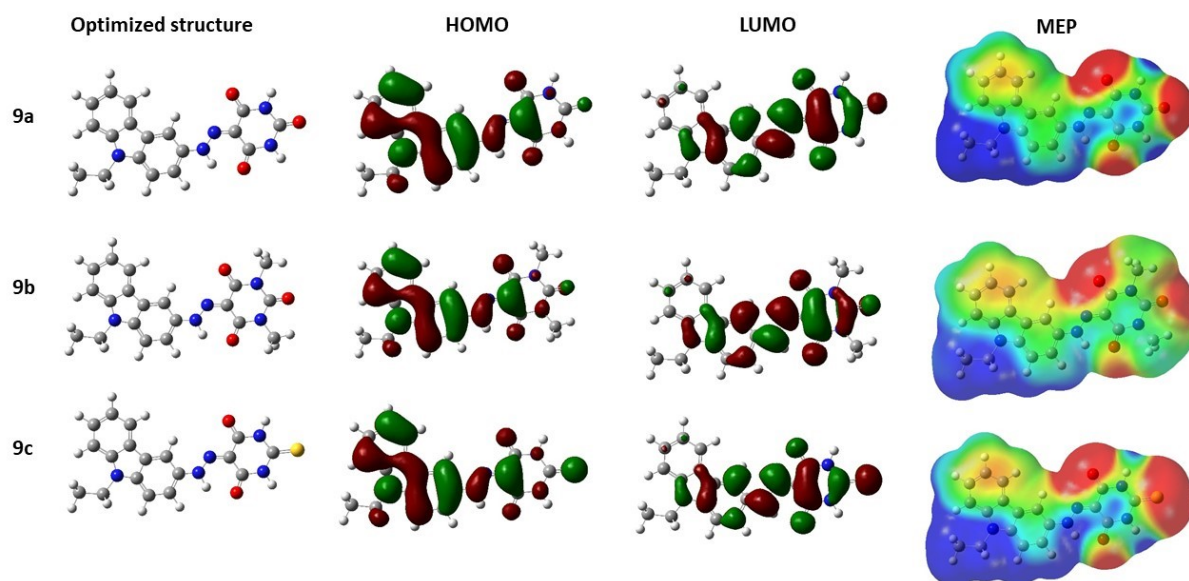

**Figure S7:** For compounds **9a-c** (a) Optimized ground state structure (b) Frontiers molecular orbitals (HOMO and LUMO) diagrams obtained from DFT calculations at B3LYP/6-311 G ++ (d,p) level (c) Electrostatic potentials calculated in the range from  $-2.0 \times 10^{-3}$  (red) to  $2.0 \times 10^{-3}$  (blue) using optimized ground state structures

**Table S2:** HOMO LUMO energy gap of compounds **8a-f** and **9a-c**

| Compound  | HOMO | LUMO | $\Delta E^c$ |
|-----------|------|------|--------------|
| <b>8a</b> | 5.60 | 2.09 | 3.51         |
| <b>8b</b> | 5.66 | 1.99 | 3.67         |
| <b>8c</b> | 5.80 | 2.31 | 3.49         |
| <b>8d</b> | 5.71 | 2.01 | 3.69         |
| <b>8e</b> | 5.69 | 2.28 | 3.41         |
| <b>8f</b> | 5.30 | 1.79 | 3.51         |
| <b>9a</b> | 5.84 | 2.66 | 3.18         |
| <b>9b</b> | 5.67 | 2.45 | 3.22         |
| <b>9c</b> | 5.84 | 2.78 | 3.06         |

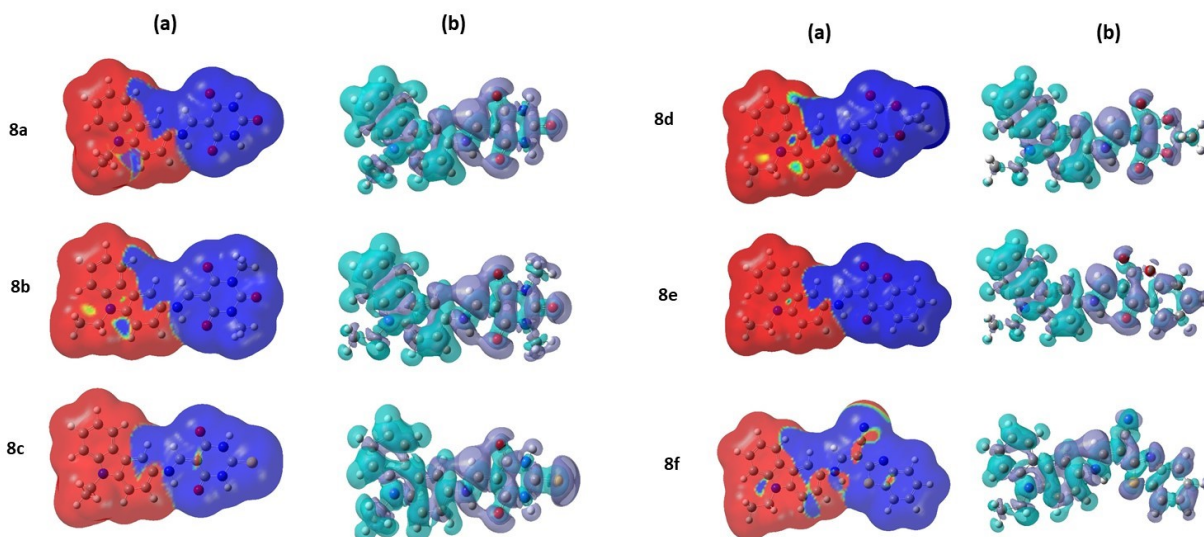

**Figure S8:** (a) Mapped surface for excitation-induced electron density difference  $\Delta\rho(r)$  (iso-value = 0.001 a.u.) on total SCF electron density for compounds **8a-f**, red/blue corresponds to negative/positive  $\Delta\rho(r)$ ; (b) Excitation-induced electron density difference ( $\Delta\rho(r)$ ) as calculated for the key excited state of compounds **8a-f** at TDDFT/B3LYP/6-311G level of approximation (iso-value = 0.001 a.u.) light/dark blue corresponds to negative/positive  $\Delta\rho(r)$ .

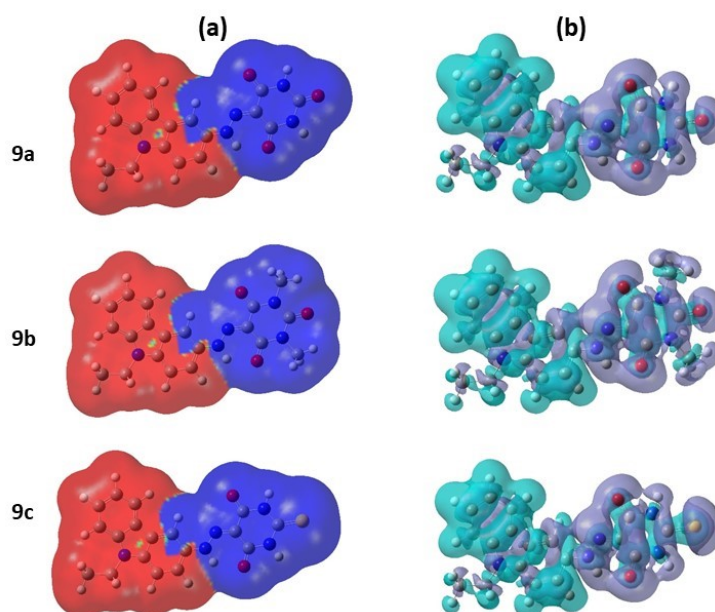

**Figure S9:** (a) Mapped surface for excitation-induced electron density difference  $\Delta\rho(r)$  (iso-value = 0.001 a.u.) on total SCF electron density for compounds **9a-c**, red/blue corresponds to negative/positive  $\Delta\rho(r)$ ; (b) Excitation-induced electron density difference ( $\Delta\rho(r)$ ) as calculated for the key excited state of compounds **9a-c** at TDDFT/B3LYP/6-311G level of approximation (iso-value = 0.001 a.u.) light/dark blue corresponds to negative/positive  $\Delta\rho(r)$ .

**Table S3:** Calculated first-order hyperpolarizability ( $\beta$ ) values for compounds **8a-f** and **9a-c** using CAM-B3LYP/ 6-311G ++ (d,p) basis set in DMSO.

| <b>Comp.</b> | <b>xxx</b> | <b>Xyy</b> | <b>xzz</b> | <b>yyy</b> | <b>yxx</b> | <b>yyz</b> | <b>zzz</b> | <b>zxx</b> | <b>zyy</b> | <b><math>\beta_{tot}</math></b> |
|--------------|------------|------------|------------|------------|------------|------------|------------|------------|------------|---------------------------------|
| <b>8a</b>    | 61.09      | 3.47       | 5.34       | -2.89      | -7.57      | -2.34      | -2.07      | -20.19     | -2.14      | 75.13                           |
| <b>8b</b>    | -1.41      | 0.32       | 7.14       | -1.96      | 0.77       | -5.67      | -38.69     | -1.18      | -6.37      | 47.13                           |
| <b>8c</b>    | 73.01      | 7.17       | 0.27       | 5.41       | 10.03      | 0.48       | -0.06      | 1.06       | 0.1        | 82.02                           |
| <b>8d</b>    | 40.66      | 3.68       | -0.4       | 6.25       | 3.44       | 0.21       | 0.11       | -2.79      | 0.42       | 45.1                            |
| <b>8e</b>    | 81.8       | 6.2        | -0.08      | 4.55       | 0.73       | -0.25      | 0          | -0.01      | 0          | 88.07                           |
| <b>8f</b>    | 56.07      | 10.74      | -0.79      | 8.4        | 5.62       | -0.55      | -0.01      | -0.04      | 0          | 67.38                           |
| <b>9a</b>    | -156.4     | -4.43      | 1.48       | 6.7        | 7.96       | 0.51       | -0.17      | 2.58       | 0.13       | 160.09                          |
| <b>9b</b>    | -142.36    | -4.59      | 1.01       | 6.71       | 7.83       | 0.38       | -0.18      | 1.99       | 0.05       | 146.72                          |
| <b>9c</b>    | -209       | -6.66      | -0.28      | 6.42       | 10.2       | 0.59       | -0.05      | 3.01       | 0.14       | 216.65                          |
